# Supplementary material
Source: PubMed Central journal article supplement (PMC7958431)
Supplement: pnas.2025596118.sapp.pdf [file pnas.2025596118.sapp.pdf]

## Supplementary Information Appendix

### Supplementary Materials and Methods

#### The Ig variable sequences of the new anti-PD1 antibodies that were used in the study:

The sequences encode the Ig variable regions of the new anti-PD1 antibodies that were used in the experiments in Figure 3-4, Figure S2 and S3. In the expression constructs, the human V<sub>H</sub>3-33 leader sequence and the human V<sub>κ</sub>3-11 leader sequence were appended to the 5' end of the variable region sequences of the HCs and LCs, respectively; human V<sub>H</sub>3-33 and V<sub>κ</sub>3-11 segments are germline components of the 17D8 antibody heavy and light chains, respectively. The IgH variable regions were expressed in association with the human IgG4 constant region, and the IgL variable regions were expressed in association with the human kappa constant region. The complete cDNAs for the HCs and LCs were cloned into the pcDNA expression vector and expressed in 293F or Expi293 cells.

#### M1-1HC

```
CAGGTGCAGTTGGTGGAGTCTGGGGGAGACGTGGTCCAGCCTGGGGGGTCCCTGAGACT
CTCCTGTGCAGCGTCTGGAGTCGCCTTCAGGGACTATGGCATGCACTGGGTCCGCCAGG
CACCAGGCAAGGGGCTGGAGTGGGTGGCAGTTATATGGTATGATGGAAGTAAGAAATATT
ATGGAGACTCCGTGAAGGGCCGATTCACCGTCTCCAGAGACAATTCCAAGAACATGTTGTA
TCTGGAAATGAACGGCCTGAAAGCCGAGGACACGGCAATGTATTATTGTGCGAGGAACGA
TGACTACTGGGGCCAGGGAACCCTGGTCACCGTCTCCTCAG
```

#### M1-2HC

```
CAGGTGCAGCTGGTGGAGTCTGGGGGAGACGTGGTCCAGCCGGGGGGGTCCCTGAGAC
TCTCCTGTGCGGCGTCTGGAGTCGCCTTCAGTGACTATGGCATGGAATGGGTCCGCCAGG
CTCCAGGCAAGGGGCTGGAGTGGCTGGCAGTTATCTGGTATGATGGAAGTAGGAAACACT
ATGCAGACTCCGTGAAGGGCCGATTCACCATCTCCCGCGACAATTCCAAGAACATTCTGTA
TCTACAAATGAACAGCCTGAGAGCCGAGGACACGGCTATGTATTACTGTGCGAGATGCCA
CTCTAAAGATGACTACTGGGGCCAGGGAACCCTGGTCACCGTCTCCTCAG
```

#### M1-3HC

```
CAGGAGTGGTTGGTGGAGTCGGGGGGAGACGTGGTCCAGCCGGGGGGGTCCCTGAGAC
TCTCCTGTGCGACGTCTAAAGTCACCTTCAATGACTTTGGCATTCACTGGGTCCGCCAGGC
TCCAGGCAAGGGACTGGAGTGGGTGGCAATTATTTGGTATGATGGAAGCAGGAATCACTA
CGCAGACTCCGTGAGGGGCCGATTCACCCTCTCCAGGGACAATTCCAAAACATGGTCCA
TCTTCACATGAGTAGCCTGAGAACCAGGACACGGCTATGTATTATTGTGCGCGAGGAATA
CACTCTAACGATGACTATTGGGGCCAGGGAACCATGGTCACCGTCTCCTCAG
```

#### M1-4HC

```
CAGGTTTCAGCTGGTGGAAATCTGGGGGAGACGTGGTCCAGCCGGGGGGGTCCCTGAGACT
CTCCTGTGCAGTGTCTGGAGTCACCTTCGGTGACTTTGGCTTCGAATGGGTCCGCCAGGC
TCCAGGCAAGGGTCTGGAGTGGGTGGCAGTTATTTGGTACGACGGAAGCAGAAAACATTA
TGCAGAGTCCGTGAGGGGCCGATTTACCATCTCCAGAGACAATTCCAGGAACATGATGTAT
CTGGAAATGACTGGACTGAGAGTCGAGGACACGGCTAAATATTACTGTACGAGAAGTCACT
CTCACGAGGACTACTGGGGCCAGGGAACCCTGGTCACCGTCTCCTCAG
```

#### M1-5HC

```
CAGGTGCAGCTGGTGGAGTCTGGGGGAGACGTGGTCCAGCCTGGGGGGTCCCTGAGACT
CTCCTGTACAGTGTCTGGAGCCGTCTTCCGTGACTTGGGCATGGAATGGGTCCGTCCAGGC
```

CCCAGGCAAGGGGCTGGAATGGTTGGCAGTTATATGGTACGACGGAGGTAGAAAACACTA  
TGCGGACTCCGTGAAGGGCCGGTTCACCATCTCCAGAGACAATTCCAGGAACATGCTCTT  
TCTGCAAATGAATGGACTGAGAGTCGACGACACGGCTATGTATTACTGTACGAGAAGCCAC  
TCTACCGATGATTACTGGGGCCAGGGAACCCTGGTCACCGTCTCCTCAG

#### M1-6HC

CAGGTGCAGTTGGTGGAGTCTGGGGGAGACGTGGTCCAGTCCGGGGGGTCCCTGAGACT  
CTCCTGTGCAGTGTCTGGAGTCGTCTTCAGTGATTATGGCTTCGAATGGGTCCGCCAGGC  
TCCAGGCAAGGGGCTGGAGTGGGTGGCAGTTATATGGTACGACGGAAGTAGGAAACATTA  
TGCAGACTCCGTCCAGGGCCGATTCACCATTTCCAGAGACAATTTCCGGAACATGTTGTAT  
CTACAAATGACTGGACTGAGAGTCGAGGACACGGCTAAATACTATTGTACGAGAAGCCACT  
CTCACGAGGACTACTGGGGCCAGGGAACCCTGGTCACCGTCTCCTCAG

#### M1-7HC

CAATTACAACCTGGTGGAGTCTGGGGGAGACGTGGTCCAGCCTGGGGGGTCCCTGAGACT  
CTCCTGTGCGGCGTCTGGGGTCGTCTTCAGTGACTTTGGCCTGGAATGGGTCCGCCAGGC  
TCCAGGCAAGGGGCTGGAGTGGCTGGCAGTTATCTGGTATGATGGAAGTCGGAACATTA  
TGCAGACTCCGTGAAGGGCCGATTCACCATCTCCAGGGACAATTCCAAGAACATGCTCTAT  
CTGCAAATGAACAGTCTGAGAGTCGAGGACACGGCTATGTACTACTGTGCGCGATGTCAC  
TCTAAAGAGGACTACTGGGGCCAGGGAACCCTTGTACCGTCTCCTCAG

#### M2-1HC

CAGGTGCAGCTGGTGGAGTCTGGGGGAGACGTGGTCCAGCCTGGGGGGTCCCTGAGACT  
CTCCTGTTACGCGTCTGGACTCGTATTCAGAGACTATGGCATGAACTGGGTCCGCCAGGC  
TCCAGGCAAGGGGCTGGAGTGGGTCCGACTTATATGGTATGATGGAACATAAAAAATATTAT  
TCAGACTTCGTGAAGGGCCGATTCACCATCTCCAGAGACAATTCCAAGAACATGTTGTATC  
TACAAATGAACAACCTGAGAGCCGAGGACACGGCTATTTATTACTGTGCGAGATTTCTAAT  
AGGTGCGACGAGGAGGGGCAATGCTATGGACTACTGGGGTCAAGGGACCTCAGTCATCG  
TCTCATCAG

#### M2-2HC

CAGGTGCAGTTGGTGGAGTCTGGGGGAGACGTGGTCCAGCCTGGGGGGTCCCTGAGACT  
CTCCTGTTACGCGTCTGGGCTCGTAATCAGTGACTATGGCATGAACTGGGTCCGCCAGGC  
TCCAGGCAAGGGGCTGGAGTGGGTCCGACTTATATGGTATGATGGAAGTAAAAAATATTAC  
TCAGACTTCGTGAAGGGCCGATTCACCATCTCCAGAGACAATTCCAAGAACATATTGTATC  
TACAAATGAACAACCTGAGAGCCGAGGACACGGCTATGTATTACTGTGCGAGATTTCTAAT  
AGGTGCGACGAGGAGGGGCAATGCTATGGACTATTGGGGTCAAGGAACCTCAGTCACCGT  
CTCATCAG

#### M2-3HC

CAGGGGCACCTGGTGGAGTCTGGGGGAGACGTGGTCCCTGCCTGGGGGGTCCCTGAGACT  
CTCCTGTACAGAGTCTGGTGTGACCTCAGTGACTTTGGCATACTGGGTCCGCCAGACT  
CCAGGCAAGGGTCTGGAGTGGGTGGCACTTATCTGGTATGATGGAAGTAAAAATTTTATG  
CTGACTCCGTGAAGGACCGATTCACCATTTCCAGAGACAATTCCAAGAATATGGTGTATCT  
GGAAATGATCAGCCTGAGAGTCGAGGATACGGCTATGTACTTCTGTGCGAGAGGGATACG  
ACGGGGGCCCTGGTTCACTTACTGGGGCCAGGACTCTGGTTACAGTCTCTACAG

#### M2-4HC

CAGGTGCAGTTGGTGGAGTCTGGGGGAGACGTGGTCCAGCCGGGGGGTCCCTGAGACT  
CTCCTGTGACGCGTCTGGAGTCGCTTCAGGAACTATGGCATGCACTGGGTCCGCCAGGC  
TCCAGGCAAGGGCCTGGAGTGGGTGGCAATTATATGGTATGATGGAAGTAAATAATTAT

GCAGACTCCGTGAAGGGCCGCTTCACCATCTCCAGAGACAATTCCAAGAATATGTTGTATC  
TTCAAATGAATAGCCTGAGAGCCGAGGACACGGCTATGTATTACTGTGCGAGACTCTCTAT  
AGGTACGACCCATTACTTTGATACGGACGACTACTGGGGTCAAGGAACCTCAGTCACCGT  
CTCCTCAG

M2-5HC

CAGGTGCAACTGGTGGAGTCTGGGGGAGACGTGGTCCAGCCGGGGGGGTCCCTGAGACT  
CTCCTGTGCAGCGTCTGGAGTCGTCTTCAGTGA CTATGGCTTGTATTGGGTCCGCCAGGC  
TCCAGGCAAGGGCCTGGAGTGGGTGGCCCTTATATGGTATGATGGGAGTAAGAAATTTTAT  
GCTGACTCCGTGAAGGGCCGATTCTCCATCTCCAGAGACAATTCCAAGAATATGTTGTATT  
TACAAATGAATAATTTGAGAGCCGACGACTCGGCTATTTATTATTGTTTCGAGAGGGGATACGA  
CAGGGGCCATGGTTTGCTTACTGGGGCCAAGGGACTCGTGTCACTGTCTCTCCAG

M1-1LC

GAAATTGTGTTGACACAGTCTCCAGCCACCCTGTCTTTGTCTCCAGGGGAAAGAGCCACCC  
TCTCCTGCAGGGCCAGTCAGAGTGTTAGCAACTCCTTATCCTGGTACCAACAGAACCCTGG  
CCAGTCTCCCAGGCTCATCATCTATGATACATCCAAGAGGGCCACTGGCATCCCAGCCAG  
GTTCACTGGCAGTGGATCTGGGACAGACTTCACTCTCACCATCAACAATCTAGAGACTGAA  
GATTTTGCAGTTTATTACTGTCACCAGCGTAGCGACTGGCCTCTCACTTTTCGGCGGAGGGA  
CCAAGGTGGAGATCAAAC

M1-2LC

GAAATTGTGTTGACACAGTTTCCGGCCACCCTGTCTCTGTCTCCCGGGGAAAGAGCCACC  
CTCTCCTGCAGGACCAGTCAGAATATTGACAGCGACTTAGCCTGGTTCCAACAGAAACCTG  
GCCAGGCTCCCAGGCTCATCATCTATGATGCATCCAACAGGGCCACTGGCATCCCAGCCA  
GGTTCAGTGGCGGTGGGTCTGGGACAGACTTCACTCTCACCATCACCAGCCTAGAGCCTG  
AAGATTTTGCAGTTTATTACTGTCAGCAGCGTACCACCTGGCCTCTCACTTTTCGGCGGAGG  
GACCAAGGTGGAGATCAAAC

M1-3LC

GAAATTGTGTTGACACAGTCTCCAGCCACCCTGTCTTTGTCTCCAGGGGAAAGAGCCACCC  
TCTCCTGCCGGACCAGTCAGAGTGTTAGCAGCGACTTAGCCTGGTTCCAACAGAAACCTG  
GCCAGGCTCCCAGGCTTTCATATTTGATGCATCCAAAAGGGTCAATGGCATCCCAGCCA  
GGTTCAGTGGCAGTGGGTCTGGGACAGACTTCACTCTCACCATCAGCAGCCTGGAACCTG  
AAGATTTTGCAGTTTATTATTGTCAGCAACGTACCGACTGGCCTCTCACTTTTCGGCGGAGG  
GTCCAGGGTGGAGATCAAAC

M1-4LC

GAAATTGTGTTGACACAGTCTCCAGCCACCCTGTCTTTGTCTCCAGGGGAAAGAGCCACCC  
TCTCCTGTAGGGCCAGTCAGAGTATTAGCAACTACTTAGCCTGGTTCCAACAGAAATCTGG  
CCAGGCTCCCAGGCTCATCATCCATGATGCATTTAAACGGGCGCTGGCATCCCAACCAG  
GTTCACTGGCAGTGGGTCTGGGACAGACTTCACTCTCACCATCAGCAGTCTAGAGCCTGA  
AGATTTTGCAGTTTATTATTGTCAGCAGCGTGACAACTGGCCTCTCAATTTTCGGCGGAGG  
ACTAAGGTGGAGATCAAAC

M1-5LC

GAAATTGTGTTGACACAGTCGCCAGCCACTCTGTCTGTGTCTCCAGGGGAAAGAGCCACC  
CTCTCCTGTAGGGCCAGTCAGAGTATTAGCAGCGACTTAGCCTGGTTCCAACAGAAACCTG  
GCCAGGCTCCCAGGCTCATCATCCATGGTGCATCCAAAAGGGCCACTGGCATCCCAGCCA  
GGTTCAGTGGCAGTGGGTCTGGGACAGACTTCACTCTCACCATCAGCAGCCTAGAGCCTG

AAGATTTTGC GGTTTATTACTGTCAGCAGCGTGACAGCTGGCCTCTCAATTTCCGGCGGAGG  
GACCAAGGTGGAGATCAAAC

M1-6LC

GAAATTGTGTTGACACAGTCTCCAGCCACCCTGTCTTTGTCTCCAGGGGAAAGAGCCACCC  
TCTCCTGTGGGGCCAGTCAGAATATTGACAACTCCTTAGCCTGGTTCCAACAGAAACCTGG  
CCAGGCTCCCAGGCTCATCATCTATGATGCATCTAAAAGGGCCACTGGCATCCCAGCCAG  
GTTCAGTGGCAGTGGGTCTGGGACAGACTTCACTCTCACCATCAGCACTCTAGAGCCTGA  
AGATTTTGCAGTTTATTATTGTCAGCAGCGTGACCATTGGCCTCTCAATTTCCGGCGGAGGG  
ACCAAGGTGGAAGTCAAAC

M1-7LC

GAAATTGAAGTGACACAGTCTCCGGCCACCCTGTCTTTGTCTCCAGGGGAAAGAGCCACC  
CTCTCCTGTAGGGCCAGTCAGAGTATTGACACCGACTTAGCCTGGTTCCAGCAGAGACCT  
GGCCAGACTCCCAGACTCATCATCTATGATGCATCCAAAAGGGCCACTGGCATCCCAGCC  
AGTTTCAGTGGCGGTGGGTCTGGGACAGACTTCACTCTCACCATCAGCAGCCTAGAGCCT  
GAAGATTTTGCAGTTTACTACTGTCAGCAGCGTACCACCTGGCCTCTCACTTTCCGGCGGAG  
GGACCAAGGTGGAGATCAAAC

M2-1LC

GAAGTTGTGTTGACACAGTCTCCAGCCACCCTGTCTTTGTCTCCAGGGGAAAGAGCCACC  
CTCTCCTGCAGGGCCAGTCAGAGTATTGACAGCGACTTAGCCTGGTCCCAACAGAAAACCT  
GGCCAGCCTCCCAGACTCATCATCTATGATGCATCCAACAGGGCCACTGGCATCCCAGCC  
AGTTTCAGTGGCAGTGGGTCTGGGACAGACTTCACTCTCACCATCAGTAGTCTAGAGCCT  
GAAGATTTTGCAGTTTATTATTGTCAGCAACGTAGCGACTGGCCTCTCACTTTCCGGCGGAG  
GGACCAAGGTGGAGATCAGAC

M2-2LC

GAAGTTGTGTTGACACAGTCTCCAGCCACCCTGTCTTTGTCTCCAGGGGAAAGAGCCACC  
CTCTCCTGCAGGGCCAGTCAGAGTATTGACAGCGACTTAGCCTGGTCCCAACAGAAACCT  
GGCCAGCCTCCCAGACTCATCATCTATGATGCATCCAACAGGGCCACTGGCATCCCAGCC  
AGTTTCAGTGGCAGTGGGTCTGGGACAGACTTCACTCTCACCATCAGCAGCCTAGAGCCT  
GAAGATTTTGCAGTTTATTATTGTCAGCAACGTAGCGACTGGCCTCTCACTTTCCGGCGGAG  
GGACCAAGGTGGAGATCAGAC

M2-3LC

GAAATTGTGTTGACACAGTCTCCAGTCATCCTGTCTTTGTCTCCAGGGGAAAGAGCCACCC  
TCTCCTGCAGGGCCAGTCAGAGTATTAGCAGCGACTTGGCCTGGTTCCAACAGACACCTG  
GCCAGGCTCCCAGGCTCATCATCTATGATGCATCCAACAGGGCCACTGGCATCCCAGCCA  
GGTTCAGTGGCAGTGGGTCTGGGACAGACTTCACTCTCACCATCAGCAGCCTAGAGCCTG  
AAGATTTTGCAGTTTATTACTGTCAGCAGCGGAGCAACTGGCCTCTCACTTTCCGGCGGAGG  
GACCAAGGTGGAGATCAAAC

M2-4LC

GAAATTGTGTTGACACAGTCTCCAGCCACCCTGTCTTTGTCTCCAGGGGAAAGAGCCACCC  
TCTCCTGCAGGGCCAGTCAGAGTATTAGCAGCTACTTAGCCTGGTACCAACAGAAGGTTG  
GCCAGGCTCCCAGGCTCATCATCTTTGATGCATCCAACAGGGCCACTGGCATCCCAGCCA  
GGTTCAGTGGCAGTGGGTCTGGGACAGACTTCACTCTCACCATCACCAGCCTAGATCCTG  
AAGATTTTGCAGTTTATTACTGTCAGCAACGTAGCGCCTGGCCTCTCACTTTCCGGCGGAGG  
GACCAAGGTGGAGATCAGAC

M2-5LC

GAAATTGTGCTGACACAGTCTCCAGCCACCCTGTCTTTGTCTCCAGGGGAAAGAGCCACC  
CTCTCCTGCAGGGCCAGTCAGAGCATTAGCAGCGACTTAACCTGGTTCCAACAGAAACCT  
GGCCAGGCTCCCAGGCTCATCATCTATGATGCATCCAACAGGGCCACTGGCATCCCAGCC  
AGGTTTCAAGTGGCAGTGGGTCTGGGACAGACTTCACTCTCACCATCAGTAGCCTCGAGCCT  
GAAGATTTTGTAGTTTATTACTGTCTGCAACGTAGCGACTGGCCTCTCACTTTCGGCGGAG  
GGACCAAGGTGGAGATCAAAC

**Fig. S1**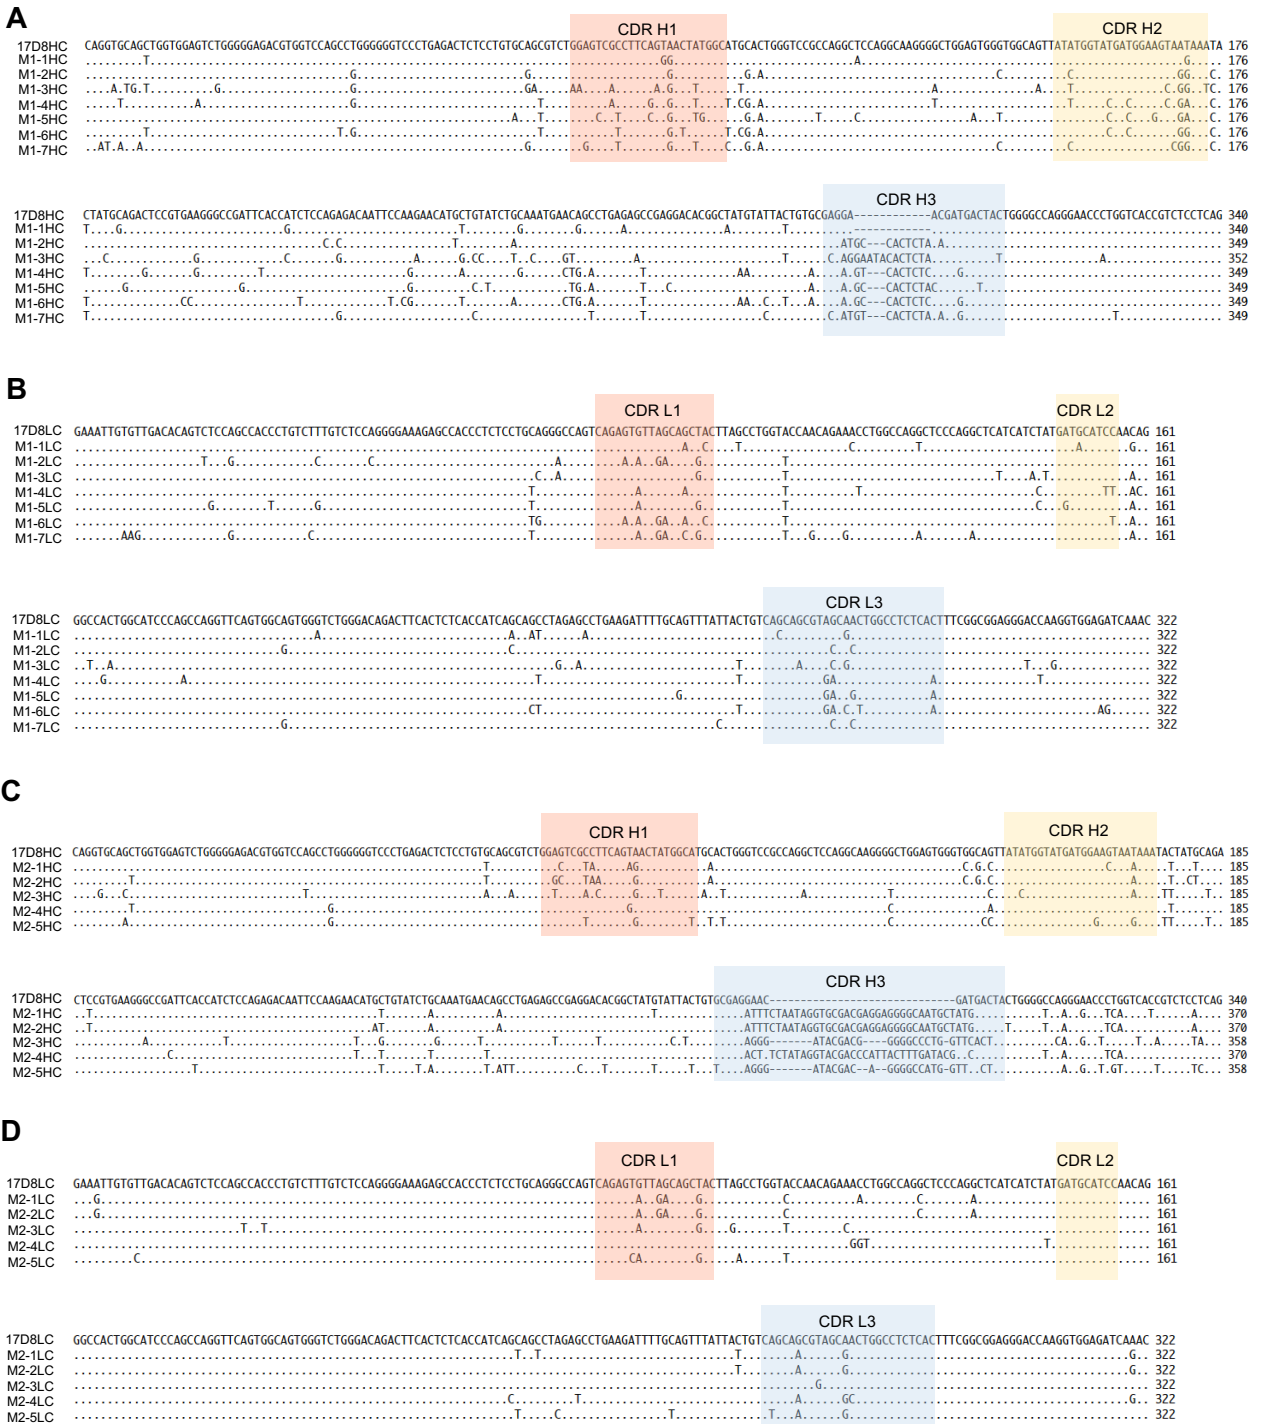

**Fig. S1.** DNA Sequence alignments of the Ig variable regions of new anti-PD1 antibodies with the 17D8HC. (A) Alignment of M1-1 to M1-7HCs with the 17D8HC. The sequence of the 17D8HC serves as the template for alignment; only SHMs in new anti-PD1 antibodies are shown below, “.” Indicates identity, “-” indicates gap in alignment. The CDRs are shaded with color. Sections B-D are organized in the same way as this section. (B) Alignment of M1-1 to M1-7LCs with the 17D8LC. (C) Alignment of M2-1 to M2-5HCs with the 17D8HC. (D) Alignment of M2-1 to M2-5LCs with the 17D8LC.



**Fig. S2.** Analysis of PD1-binding activities of new anti-PD1 antibodies. This figure supplements Fig. 3 by showing the analysis of additional antibodies isolated from Mouse Models 1 and 2. Sections A-C in this figure correspond to A-C in Figure 3, Section D-F in this figure relate to E-G in Fig. 3.



**Fig. S3**

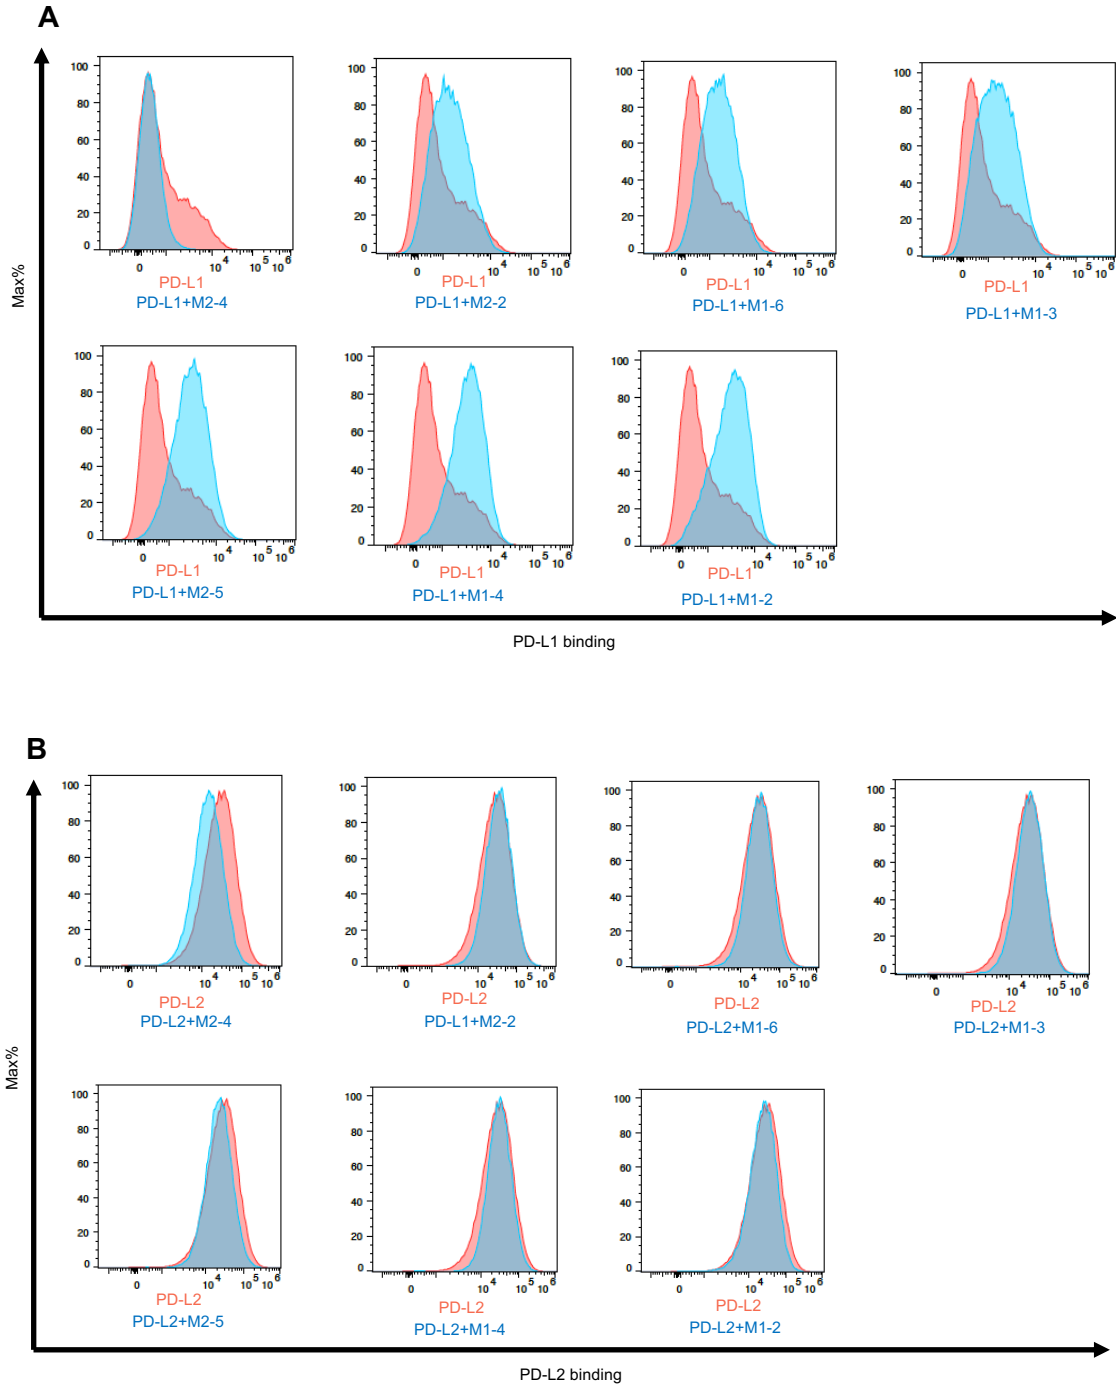

**Fig. S3.** The effects of new anti-PD1 antibodies on PD1/ligand interaction. This figure supplements Fig. 4 by presenting the characterization of additional antibodies isolated from Mouse Model 1 and 2. Sections A and B in this figure relate to (A) and (B) in Fig. 4.
